# Supplementary material for: Macromolecular crowders and osmolytes modulate the structural and catalytic properties of alkaline molten globular 5-aminolevulinate synthase
Source: Royal Society of Chemistry journal article supplement (doi:10.1039/c6ra22533k), 2016-01-01
Supplement: c6ra22533k1.pdf [file c6ra22533k1.pdf]

## Supporting Document

### Macromolecular Crowders and Osmolytes Modulate the Structural and Catalytic Properties of Alkaline Molten Globular 5-Aminolevulinate Synthase

Bosko M. Stojanovski, Leonid Breydo, Vladimir N. Uversky, and Gloria C. Ferreira

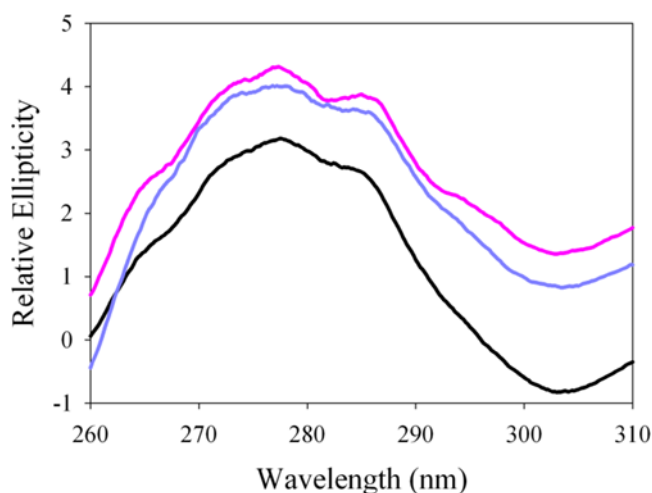

**Figure S1.** Near-UV CD measurements of mALAS2 at pH 9.5 and in the presence of 20% (w/v) TMAO (purple) or glycerol (pink). The spectrum at pH 7.5 and in the absence of cosolvents is shown as a black trace. Note that the spectra at pH 9.5 start at a higher elliptical value due to alkaline-induced modifications in the PLP microenvironment. All measurements were done at 37 °C using 1 mg/mL protein.

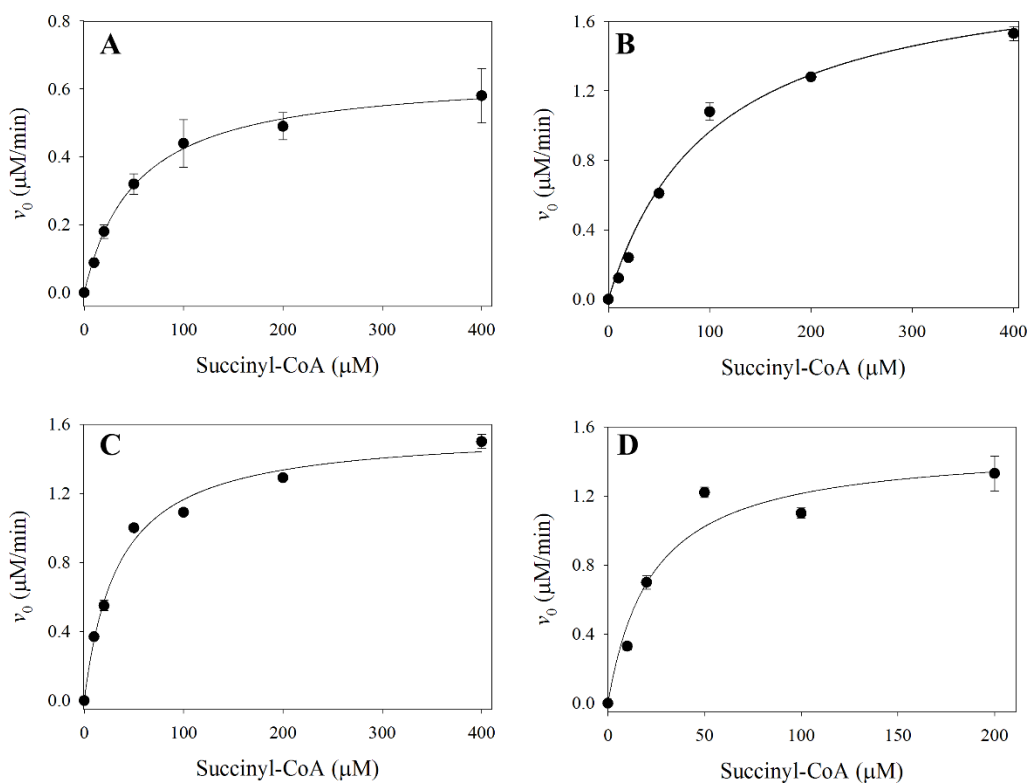

**Figure S2. Primary plots constructed from the initial velocities of the mALAS2<sup>alk</sup> catalyzed reaction between glycine and succinyl-CoA (pH 9.5 and 37 °C) in the presence of (A) 20% TMAO, (B) 20% glycerol, (C) 20% Ficoll 400, and (D) 20% Dextran 200 fitted into the Michaelis-Menten equation. All reactions were performed in duplicates and the error bars are obscured by the symbols.**
